# Supplementary material for: Electrochemiluminescence sensor using quantum dots based on a G-quadruplex aptamer for the detection of Pb2+
Source: Royal Society of Chemistry journal article supplement (doi:10.1039/c3ra41616j), 2013-01-01
Supplement: c3ra41616j.pdf [file c3ra41616j.pdf]

## Electronic Supporting Information

### 5 **Electrochemiluminescence Sensor Using Quantum Dots Based on G- quadruplex Aptamer and the Detection of Pb<sup>2+</sup>**

Hong Hai,<sup>a</sup> Feng Yang<sup>a</sup> and Jianping Li\*<sup>a</sup>

10

#### **The optimization of experimental conditions**

In G-rich DNA, contiguous G-quartets stack to give structures of G-quadruplex. The resulting aptamer-Pb<sup>2+</sup> octamer is a sandwich of two hydrogen-bonded G-quartets. The pH value was investigated considering its impact on hydrogen bonding. The intensity of ECL signal as  
15 a response of the system gradually increases with the increasing of pH value, reaching the highest at pH=7.0. The intensity of ECL signal decreases gradually in an alkaline environment, which may be resulted from the generation of precipitation Pb(OH)<sub>2</sub>. Therefore, the pH value was selected at 7.0 to detect Pb<sup>2+</sup> in this experimental system. The ECL signal of the experiment was based on the formation of G-quadruplex by Fe<sub>3</sub>O<sub>4</sub>/Au-Aptamer and Pb<sup>2+</sup>, which exposed 3-NH<sub>2</sub> of aptamer to bind to QDs. Therefore, the reaction time after adding Pb<sup>2+</sup> is also an important parameter affecting the sensitivity of the system. If the reaction time is too short, no more G-quadruplex  
20 structure would be formed, which affects the detection sensitivity of the system; In this experiment, the reaction time of Pb<sup>2+</sup> was also studied. The intensity of ECL signal is the maximum when the reaction time of Pb<sup>2+</sup> is about 2 h, corresponding to the largest number of G-quadruplex structures. In the present study, the reaction time of Pb<sup>2+</sup> was controlled at 2h.

25 **TEM analysis of nanoparticles of Fe<sub>3</sub>O<sub>4</sub>, Fe<sub>3</sub>O<sub>4</sub>/Au NPs and CdTe quantum dots were performed by a transmission electron microscope (JEOL, JEM-2100F 3010, Japan).**

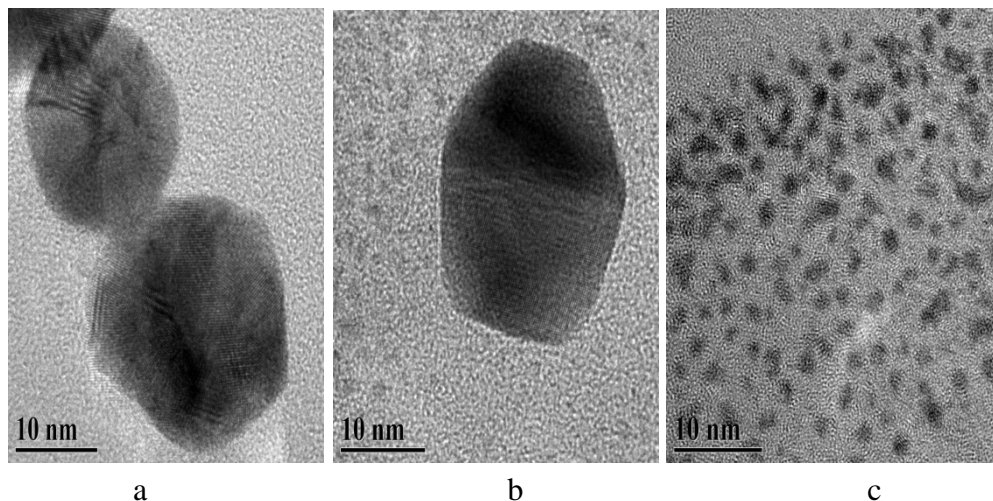

**Fig. S1** TEM images of nanoparticles of Fe<sub>3</sub>O<sub>4</sub> (a), Fe<sub>3</sub>O<sub>4</sub>/Au NPs (b) and CdTe quantum dots (c)

30
